# Supplementary material for: Analysis of Plasma Protein Concentrations and Enzyme Activities in Cattle within the Ex-Evacuation Zone of the Fukushima Daiichi Nuclear Plant Accident
Source: PubMed Central journal article supplement (PMC4861266; doi:10.1371/journal.pone.0155069), 2016-05-09
Supplement: pone.0155069.s002.pdf [file pone.0155069.s002.pdf]

**S2 Fig.  $^{137}\text{Cs}$  concentrations in the peripheral blood and the skeletal muscle of cattle in the ex-evacuation zone**

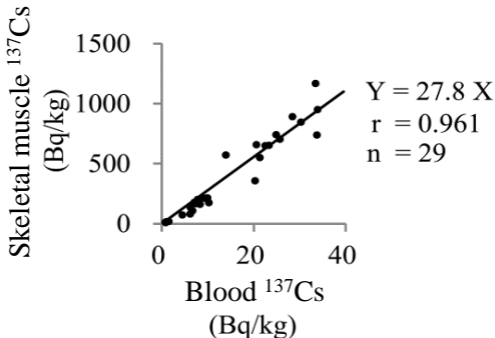

The dot plot shows the correlation of the  $^{137}\text{Cs}$  concentration of peripheral blood with that of the skeletal muscle in cattle in the ex-evacuation zone.  $r$  indicates coefficient of determination.  $p$  value  $< 0.001$ .
