# Supplementary material for: Analysis of Plasma Protein Concentrations and Enzyme Activities in Cattle within the Ex-Evacuation Zone of the Fukushima Daiichi Nuclear Plant Accident
Source: PubMed Central journal article supplement (PMC4861266; doi:10.1371/journal.pone.0155069), 2016-05-09
Supplement: pone.0155069.s003.pdf [file pone.0155069.s003.pdf]

### S3 Fig. Correlation analysis between dose rate and cumulative dose of the individual cattle in the ex-evacuation zone

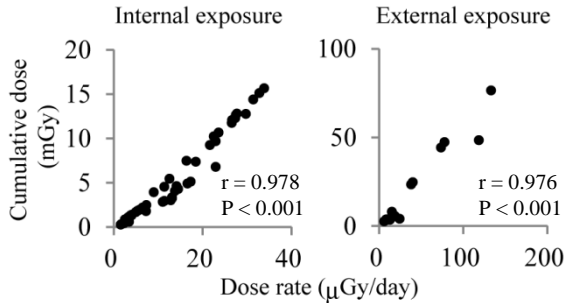

r and p is Pearson's correlation coefficient and p values, respectively.
