# Supplementary material for: Analysis of Plasma Protein Concentrations and Enzyme Activities in Cattle within the Ex-Evacuation Zone of the Fukushima Daiichi Nuclear Plant Accident
Source: PubMed Central journal article supplement (PMC4861266; doi:10.1371/journal.pone.0155069), 2016-05-09
Supplement: pone.0155069.s004.pdf [file pone.0155069.s004.pdf]

**S4 Fig. Correlation analysis between cumulative dose from radiocesium and plasma component levels in cattle of the ex-evacuation zone**

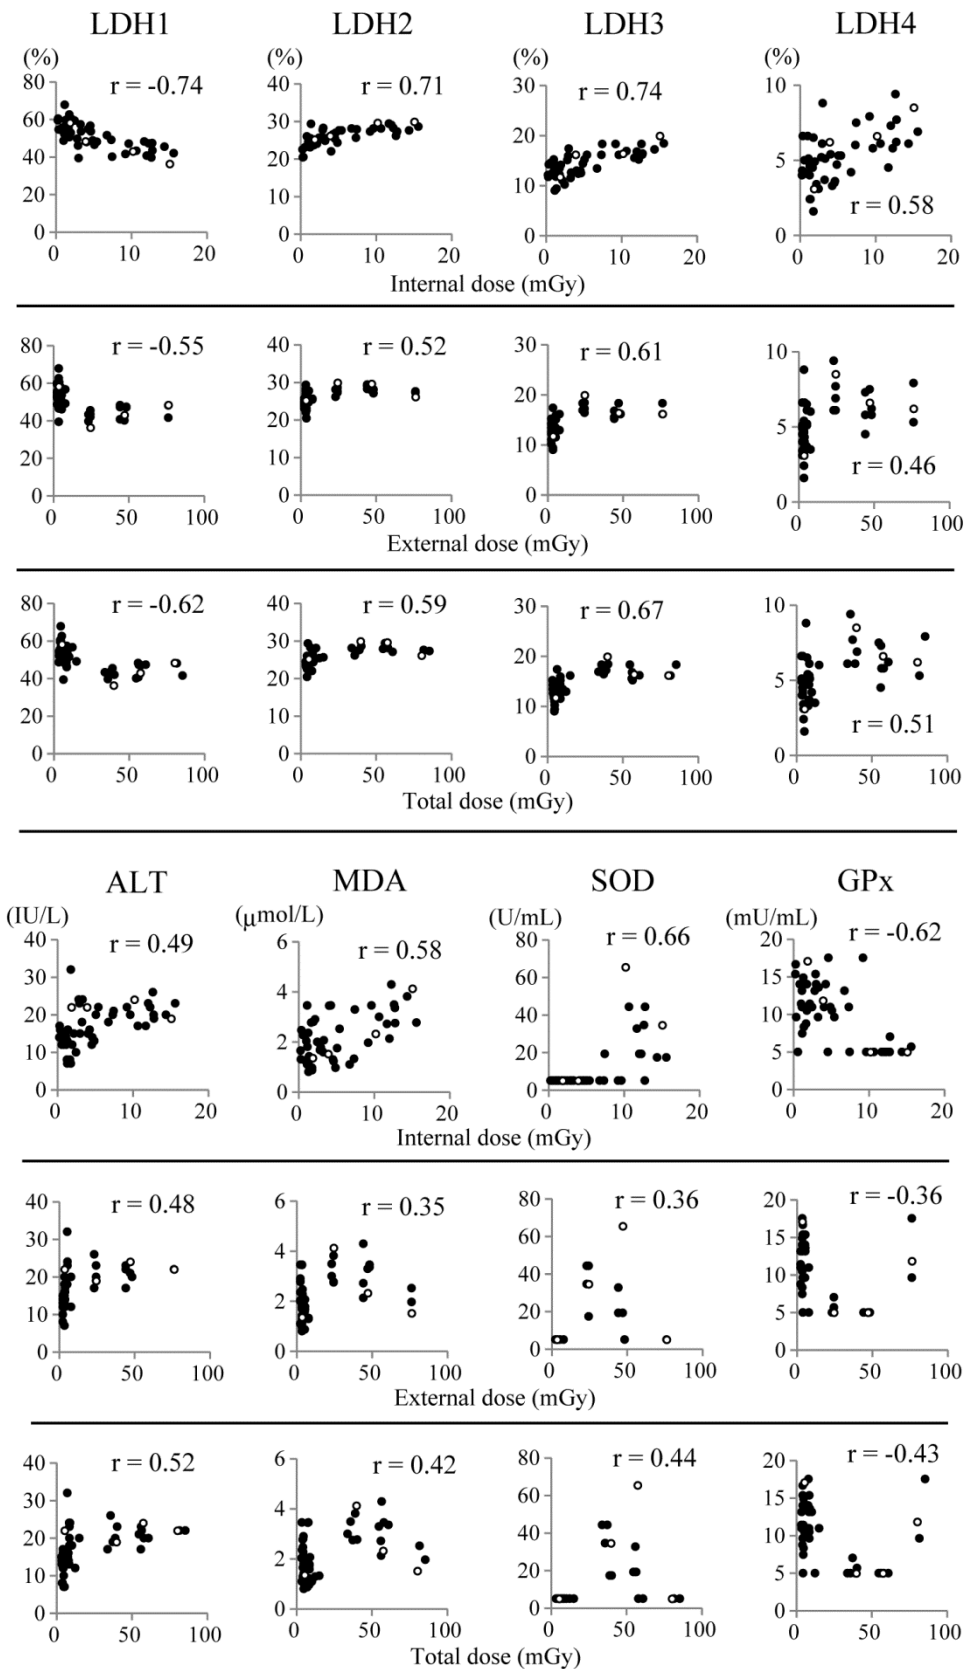

r is Pearson's correlation coefficient. p values are Shown in S4 Table.
