# Supplementary material for: Analysis of Plasma Protein Concentrations and Enzyme Activities in Cattle within the Ex-Evacuation Zone of the Fukushima Daiichi Nuclear Plant Accident
Source: PubMed Central journal article supplement (PMC4861266; doi:10.1371/journal.pone.0155069), 2016-05-09
Supplement: pone.0155069.s005.pdf [file pone.0155069.s005.pdf]

**S5 Fig. Histological findings observed in each tissue**

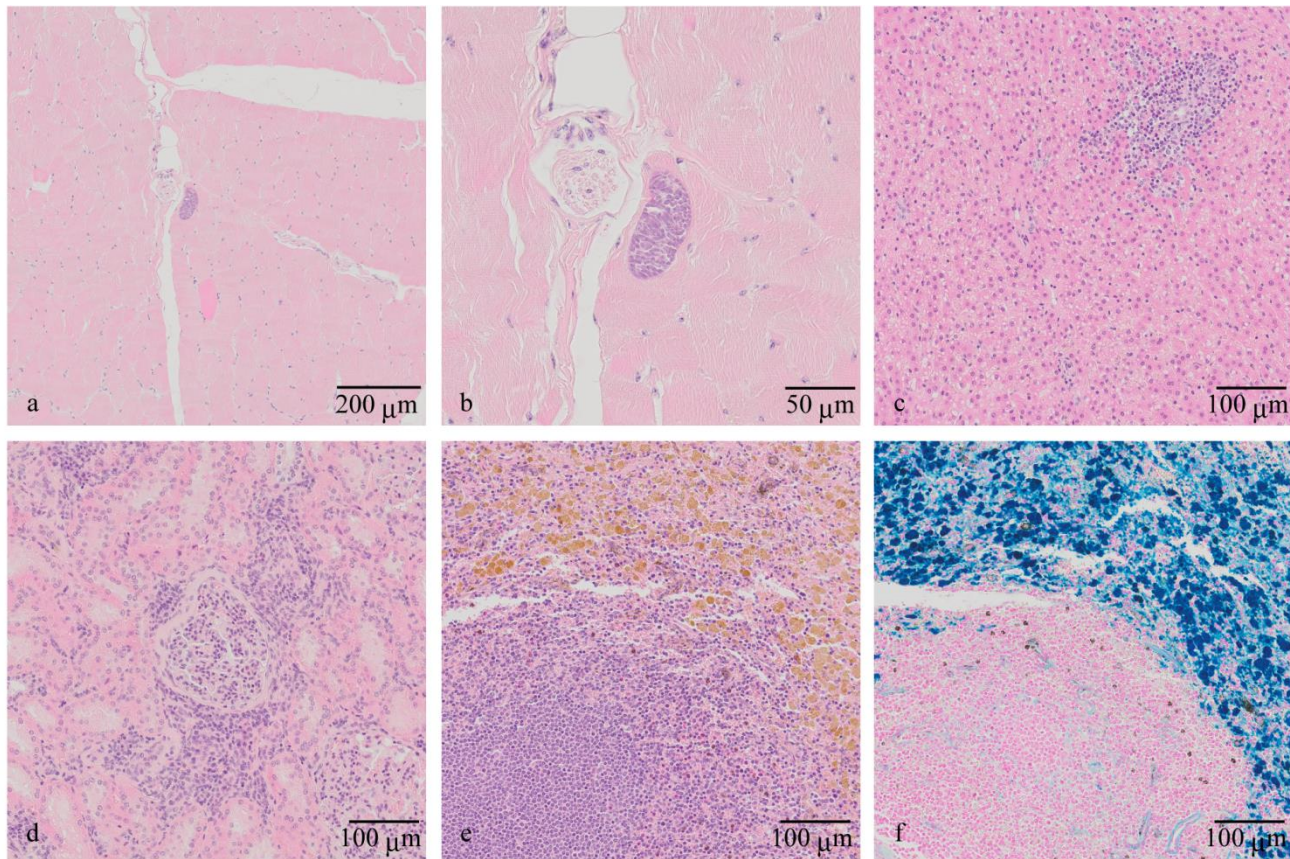

**a-c.** H&E staining. **f.** Iron staining by Prussian blue staining. **a, b.** *Sarcocystis* cysts in the H1 biceps femoris muscle. **c.** inflammatory cell infiltration in the L6 liver. **d.** inflammatory cell infiltration of kidney in the L2 kidney. **e, f.** Hem siderin deposition in the L5 Spleen.
