# Supplementary material for: Analysis of Plasma Protein Concentrations and Enzyme Activities in Cattle within the Ex-Evacuation Zone of the Fukushima Daiichi Nuclear Plant Accident
Source: PubMed Central journal article supplement (PMC4861266; doi:10.1371/journal.pone.0155069), 2016-05-09
Supplement: pone.0155069.s006.pdf [file pone.0155069.s006.pdf]

**S1 Table. Radiocesium concentrations in the skeletal muscle of individual cattle and that in the soil where cattle were captured**

| No. | Sampling date | Radiocesium concentration |                   |                        |                   | No. | Sampling date | Radiocesium concentration |                   |                        |                   |
|-----|---------------|---------------------------|-------------------|------------------------|-------------------|-----|---------------|---------------------------|-------------------|------------------------|-------------------|
|     |               | Skeletal muscle Bq/kg     |                   | Soil Bq/m <sup>2</sup> |                   |     |               | Skeletal muscle Bq/kg     |                   | Soil Bq/m <sup>2</sup> |                   |
|     |               | <sup>137</sup> Cs         | <sup>134</sup> Cs | <sup>137</sup> Cs      | <sup>134</sup> Cs |     |               | <sup>137</sup> Cs         | <sup>134</sup> Cs | <sup>137</sup> Cs      | <sup>134</sup> Cs |
| 1   | 2011/8/31     | 74.1                      | 63.7              | 297014.1               | 247585.6          | 26  | 2012/3/8      | 173.9                     | 132.2             | 91809.3                | 65520.13          |
| 2   | 2011/8/31     | 165.6                     | 141.5             | 297014.1               | 247585.6          | 27  | 2012/3/8      | 207                       | 140               | 91809.3                | 65520.13          |
| 3   | 2011/8/31     | 81.2                      | 68.5              | 297014.1               | 247585.6          | 28  | 2012/3/14     | 200                       | 145               | 133664.3               | 91386.53          |
| 4   | 2011/8/31     | 107.7                     | 94.1              | 297014.1               | 247585.6          | 29  | 2012/3/14     | 291.8                     | 206.1             | 133664.3               | 91386.53          |
| 5   | 2011/11/15    | 649.9                     | 503.7             | 183573.1               | 146166.3          | 30  | 2012/3/14     | 263                       | 208               | 133664.3               | 91386.53          |
| 6   | 2011/11/29    | 652.8                     | 521.7             | 269555.2               | 213646.4          | 31  | 2012/3/14     | 213.9                     | 156.5             | 133664.3               | 91386.53          |
| 7   | 2011/11/29    | 357.9                     | 289.8             | 269555.2               | 213646.4          | 32  | 2012/5/25     | 638.3                     | 413.8             | 244872                 | 164345.3          |
| 8   | 2011/12/9     | 572.1                     | 450.9             | 269384.9               | 211687.3          | 33  | 2012/5/25     | 1032.9                    | 671.10            | 244872                 | 164345.3          |
| 9   | 2011/12/9     | 549.8                     | 437.5             | 269384.9               | 211687.3          | 34  | 2012/6/27     | 1864.4                    | 967.7             | 1382707                | 926691.9          |
| 10  | 2011/12/9     | 658.1                     | 516.2             | 269384.9               | 211687.3          | 35  | 2012/6/27     | 1201.1                    | 873.3             | 1382707                | 926691.9          |
| 11  | 2012/1/24     | 1167.9                    | 895.6             | 152825                 | 109983.3          | 36  | 2012/7/10     | 488.1                     | 334.5             | 2207312                | 1390773           |
| 12  | 2012/1/24     | 846.1                     | 643.4             | 152825                 | 109983.3          | 37  | 2012/7/10     | 679.8                     | 464.7             | 2207312                | 1390773           |
| 13  | 2012/1/24     | 890.6                     | 669.7             | 152825                 | 109983.3          | 38  | 2012/7/10     | 950.3                     | 926.6             | 2207312                | 1390773           |
| 14  | 2012/1/24     | 703.7                     | 535.0             | 152825                 | 109983.3          | 39  | 2012/7/31     | 1177.0                    | 1129.4            | 1228569                | 763901.4          |
| 15  | 2012/1/24     | 739.6                     | 562.8             | 152825                 | 109983.3          | 40  | 2012/7/31     | 1475.5                    | 1020.7            | 1228569                | 763901.4          |
| 16  | 2012/3/1      | 133.5                     | 97.1              | 136426.6               | 95518.23          | 41  | 2012/7/31     | 1534.8                    | 939.6             | 1228569                | 763901.4          |
| 17  | 2012/3/1      | 213.1                     | 153.3             | 136426.6               | 95518.23          | 42  | 2012/8/3      | 947.2                     | 575.1             | 1306851                | 808743.3          |
| 18  | 2012/3/1      | 185.6                     | 133.8             | 136426.6               | 95518.23          | 43  | 2012/8/3      | 1245.3                    | 824.0             | 1306851                | 808743.3          |
| 19  | 2012/3/1      | 741.5                     | 539.6             | 136426.6               | 95518.23          | 44  | 2012/8/7      | 1199.9                    | 917.2             | 626551.8               | 400780.7          |
| 20  | 2012/3/8      | 418.3                     | 260.6             | 91809.3                | 65520.13          | 45  | 2012/8/7      | 1643.5                    | 938.9             | 626551.8               | 400780.7          |
| 21  | 2012/3/8      | 345.2                     | 245.1             | 91809.3                | 65520.13          | 46  | 2012/8/10     | 1928.2                    | 1130.9            | 671849.8               | 414980.9          |
| 22  | 2012/3/8      | 272.6                     | 184.2             | 91809.3                | 65520.13          | 47  | 2012/8/10     | 1648.6                    | 949.5             | 671849.8               | 414980.9          |
| 23  | 2012/3/8      | 162.7                     | 117.3             | 91809.3                | 65520.13          | 48  | 2012/8/10     | 1742.0                    | 1142.8            | 671849.8               | 414980.9          |
| 24  | 2012/3/8      | 177.8                     | 128.1             | 91809.3                | 65520.13          | 49  | 2012/8/10     | 2046.4                    | 1139.0            | 671849.8               | 414980.9          |
| 25  | 2012/3/8      | 309.1                     | 226.4             | 91809.3                | 65520.13          |     |               |                           |                   |                        |                   |

Numbers in red indicate the values calculated from radiocesium concentration of blood.
