# Supplementary material for: Analysis of Plasma Protein Concentrations and Enzyme Activities in Cattle within the Ex-Evacuation Zone of the Fukushima Daiichi Nuclear Plant Accident
Source: PubMed Central journal article supplement (PMC4861266; doi:10.1371/journal.pone.0155069), 2016-05-09
Supplement: pone.0155069.s007.pdf [file pone.0155069.s007.pdf]

**S2 Table. Correlation coefficient between dose rate and plasma components in cattle of the ex-evacuation zone**

|       | Internal dose rate |        | External dose rate |        | Total dose rate |        |
|-------|--------------------|--------|--------------------|--------|-----------------|--------|
|       | r                  | P      | r                  | p      | r               | p      |
| TP    | 0.22               | 0.17   | 0.07               | 0.64   | 0.11            | 0.47   |
| AST   | 0.28               | 0.06   | 0.19               | 0.22   | 0.23            | 0.14   |
| TG    | 0.05               | 0.73   | -0.03              | 0.86   | -0.01           | 0.94   |
| ALT   | 0.53               | < 0.01 | 0.48               | < 0.01 | 0.54            | < 0.01 |
| ALP   | -0.06              | 0.71   | 0.00               | 0.99   | -0.01           | 0.94   |
| LDH   | 0.26               | 0.09   | 0.09               | 0.55   | 0.14            | 0.37   |
| LDH-1 | -0.75              | < 0.01 | -0.49              | < 0.01 | -0.60           | < 0.01 |
| LDH-2 | 0.72               | < 0.01 | 0.45               | < 0.01 | 0.55            | < 0.01 |
| LDH-3 | 0.72               | < 0.01 | 0.57               | < 0.01 | 0.66            | < 0.01 |
| LDH-4 | 0.56               | < 0.01 | 0.44               | < 0.01 | 0.51            | < 0.01 |
| LDH-5 | 0.30               | 0.05   | 0.04               | 0.80   | 0.10            | 0.52   |
| BUN   | 0.17               | 0.27   | -0.31              | 0.04   | -0.23           | 0.13   |
| CRE   | -0.33              | 0.03   | -0.22              | 0.16   | -0.26           | 0.09   |
| TC    | -0.10              | 0.54   | -0.26              | 0.09   | -0.25           | 0.11   |
| GLU   | 0.35               | 0.02   | -0.16              | 0.32   | -0.06           | 0.72   |
| NEFA  | 0.05               | 0.77   | 0.06               | 0.71   | 0.06            | 0.67   |
| MDA   | 0.53               | < 0.01 | 0.34               | 0.03   | 0.41            | < 0.01 |
| SOD   | 0.60               | < 0.01 | 0.27               | 0.08   | 0.37            | 0.02   |
| GPx   | -0.55              | < 0.01 | -0.33              | 0.03   | -0.41           | < 0.01 |

r and p is Pearson's correlation coefficient and p value, respectively.
