# Supplementary material for: Analysis of Plasma Protein Concentrations and Enzyme Activities in Cattle within the Ex-Evacuation Zone of the Fukushima Daiichi Nuclear Plant Accident
Source: PubMed Central journal article supplement (PMC4861266; doi:10.1371/journal.pone.0155069), 2016-05-09
Supplement: pone.0155069.s008.pdf [file pone.0155069.s008.pdf]

**S3 Table. Correlation coefficient between oxidative stress markers and other plasma components in cattle of the ex-evacuation zone**

|       | MDA   |        | SOD   |        | GPx   |        |
|-------|-------|--------|-------|--------|-------|--------|
|       | r     | p      | r     | p      | r     | p      |
| TP    | 0.24  | 0.12   | 0.46  | < 0.01 | -0.17 | 0.27   |
| AST   | -0.02 | 0.89   | 0.07  | 0.64   | 0.11  | 0.47   |
| TG    | 0.36  | 0.06   | 0.27  | 0.08   | -0.35 | 0.02   |
| ALT   | 0.19  | 0.23   | 0.32  | 0.04   | -0.11 | 0.48   |
| ALP   | -0.19 | 0.22   | -0.06 | 0.70   | 0.31  | 0.04   |
| LDH   | 0.07  | 0.65   | 0.27  | 0.08   | -0.09 | 0.56   |
| LDH-1 | -0.47 | < 0.01 | -0.54 | < 0.01 | 0.39  | 0.01   |
| LDH-2 | 0.26  | 0.09   | 0.51  | < 0.01 | -0.39 | 0.01   |
| LDH-3 | 0.47  | < 0.01 | 0.50  | < 0.01 | -0.40 | < 0.01 |
| LDH-4 | 0.42  | < 0.01 | 0.46  | < 0.01 | -0.34 | 0.02   |
| LDH-5 | 0.29  | 0.06   | 0.23  | 0.13   | -0.15 | 0.32   |
| BUN   | 0.15  | 0.35   | 0.05  | 0.77   | 0.02  | 0.88   |
| CRE   | -0.22 | 0.16   | -0.23 | 0.14   | 0.21  | 0.17   |
| TC    | -0.12 | 0.43   | -0.07 | 0.64   | 0.18  | 0.25   |
| GLU   | 0.01  | 0.97   | 0.21  | 0.18   | 0.03  | 0.83   |
| NEFA  | 0.04  | 0.78   | -0.15 | 0.32   | -0.20 | 0.20   |

r and p is Pearson's correlation coefficient and p values, respectively.
