# Supplementary material for: Analysis of Plasma Protein Concentrations and Enzyme Activities in Cattle within the Ex-Evacuation Zone of the Fukushima Daiichi Nuclear Plant Accident
Source: PubMed Central journal article supplement (PMC4861266; doi:10.1371/journal.pone.0155069), 2016-05-09
Supplement: pone.0155069.s009.pdf [file pone.0155069.s009.pdf]

**S4 Table. Cumulative dose of internal and external exposure of radiocesium**

| Cumulative dose (mGy)* | Mean        | Median | Range      |
|------------------------|-------------|--------|------------|
| Internal exposure      | 5.3 ± 4.7   | 3.3    | 0.3 – 15.6 |
| External exposure      | 16.9 ± 21.7 | 4.0    | 2.5 – 76.3 |
| Total exposure         | 22.1 ± 24.8 | 8.5    | 3.5 – 85.5 |

\*The cumulative dose from  $^{134}\text{Cs}$  and  $^{137}\text{Cs}$  during certain duration were calculated as

$$\sum_{k=0}^n \left\{ C_{\text{Cs134}} A_{\text{Cs134}} \frac{1}{2} \left(\frac{1}{2}\right)^{\frac{k}{T_{1/2\text{Cs134}}}} + C_{\text{Cs137}} A_{\text{Cs137}} \left(\frac{1}{2}\right)^{\frac{k}{T_{1/2\text{Cs137}}}} \right\}$$

C; coefficient ( $\mu\text{Gy/day}$ )/(Bq/kg) for internal exposure, ( $\mu\text{Gy/day}$ )/(Bq/m<sup>2</sup>) for external exposure of the reference deer by ICRP Pub.108.

A; radiocesium concentration (Bq/kg) in the skeletal muscle for internal exposure or soil (Bq/m<sup>2</sup>) for external exposure as of March 15, 2011.

$T_{1/2}$ ; half life (days), 754 for  $^{134}\text{Cs}$  and 10983 for  $^{137}\text{Cs}$ .

n; period from March 15 to the day of capture (days).
