# Supplementary material for: Analysis of Plasma Protein Concentrations and Enzyme Activities in Cattle within the Ex-Evacuation Zone of the Fukushima Daiichi Nuclear Plant Accident
Source: PubMed Central journal article supplement (PMC4861266; doi:10.1371/journal.pone.0155069), 2016-05-09
Supplement: pone.0155069.s010.pdf [file pone.0155069.s010.pdf]

**S5 Table. Correlation coefficient between cumulative dose and plasma components in cattle of the ex-evacuation zone**

|       | Internal dose |        | External dose |        | Total dose |        |
|-------|---------------|--------|---------------|--------|------------|--------|
|       | r             | p      | r             | p      | r          | p      |
| TP    | 0.26          | 0.9    | 0.11          | 0.48   | 0.15       | 0.35   |
| AST   | 0.23          | 0.15   | 0.19          | 0.23   | 0.21       | 0.18   |
| TG    | 0.15          | 0.33   | 0.06          | 0.71   | 0.08       | 0.61   |
| ALT   | 0.49          | < 0.01 | 0.48          | < 0.01 | 0.52       | < 0.01 |
| ALP   | -0.07         | 0.67   | 0.00          | 0.99   | -0.01      | 0.94   |
| LDH   | 0.24          | 0.12   | 0.17          | 0.28   | 0.19       | 0.22   |
| LDH-1 | -0.74         | < 0.01 | -0.55         | < 0.01 | -0.62      | < 0.01 |
| LDH-2 | 0.71          | < 0.01 | 0.52          | < 0.01 | 0.59       | < 0.01 |
| LDH-3 | 0.74          | < 0.01 | 0.61          | < 0.01 | 0.67       | < 0.01 |
| LDH-4 | 0.58          | < 0.01 | 0.46          | < 0.01 | 0.51       | < 0.01 |
| LDH-5 | 0.25          | 0.10   | 0.08          | 0.62   | 0.11       | 0.46   |
| BUN   | 0.08          | 0.63   | -0.32         | 0.04   | -0.27      | 0.08   |
| CRE   | -0.30         | 0.05   | -0.18         | 0.26   | -0.21      | 0.17   |
| TC    | -0.18         | 0.24   | -0.28         | 0.07   | -0.28      | 0.07   |
| GLU   | 0.26          | 0.09   | -0.11         | 0.49   | -0.05      | 0.77   |
| NEFA  | -0.02         | 0.90   | -0.01         | 0.93   | -0.02      | 0.92   |
| MDA   | 0.58          | < 0.01 | 0.35          | 0.02   | 0.42       | < 0.01 |
| SOD   | 0.66          | < 0.01 | 0.36          | 0.02   | 0.44       | < 0.01 |
| GPx   | -0.62         | < 0.01 | -0.36         | 0.02   | -0.43      | < 0.01 |

r and p is Pearson's correlation coefficient and p values, respectively.
