# Supplementary material for: Analysis of Plasma Protein Concentrations and Enzyme Activities in Cattle within the Ex-Evacuation Zone of the Fukushima Daiichi Nuclear Plant Accident
Source: PubMed Central journal article supplement (PMC4861266; doi:10.1371/journal.pone.0155069), 2016-05-09
Supplement: pone.0155069.s011.pdf [file pone.0155069.s011.pdf]

**S6 Table. Histological findings in 12 cattle of the ex-evacuation zone**

| Sample No. | Dose rate ( $\mu\text{Gy}/\text{day}$ ) |          |       | Abnormal findings |      |       |        |        |
|------------|-----------------------------------------|----------|-------|-------------------|------|-------|--------|--------|
|            | Internal                                | External | Total | Muscle            | Lung | Liver | Kidney | Spleen |
| H1         | 33.9                                    | 40.1     | 74.0  | S                 | N    | -     | N      | -      |
| H2         | 32.8                                    | 40.1     | 72.9  | S                 | -    | N     | -      | H      |
| H3         | 31.4                                    | 40.1     | 71.5  | S                 | N    | N     | N      | H      |
| H4         | 27.6                                    | 38.2     | 65.8  | S                 | N    | N     | N      | -      |
| H5         | 26.7                                    | 73.6     | 100.3 | S                 | N    | N     | N      | I      |
| L1         | 4.0                                     | 8.8      | 12.9  | S                 | N    | -     | I      | N      |
| L2         | 3.5                                     | 8.8      | 12.4  | N                 | N    | N     | N      | H      |
| L3         | 3.4                                     | 6.0      | 9.4   | S                 | N    | N     | N      | N      |
| L4         | 3.1                                     | 6.0      | 9.1   | S                 | N    | N     | N      | N      |
| L5         | 2.6                                     | 8.8      | 11.4  | S                 | N    | N     | N      | H      |

S, *Sarcocystis* cyst; N, no abnormalities; -, no histological analysis; H, Hemosiderin deposition; I, Inflammatory cell infiltration.
